# Supplementary material
Source: Springer Nature journal article supplement (https://www.springermedizin.de/resource/supplementary/12913_2008_671_MOESM2_ESM.pdf/9535286)
Supplement: MOESM2 [file 9535286]

# Neutral scores

| Node 0    |       |
|-----------|-------|
| Mean      | 5.043 |
| Std. Dev. | 3.958 |
| n         | 117   |
| %         | 100.0 |
| Predicted | 5.043 |

Social needs  
Improvement=1.729

$\leq 5.50$

$> 5.50$

| Node 1    |       |
|-----------|-------|
| Mean      | 4.563 |
| Std. Dev. | 3.366 |
| n         | 103   |
| %         | 88.0  |
| Predicted | 4.563 |

| Node 2    |       |
|-----------|-------|
| Mean      | 8.571 |
| Std. Dev. | 5.971 |
| n         | 14    |
| %         | 12.0  |
| Predicted | 8.571 |

GAFf adm  
Improvement=1.167

$\leq 58$

$> 58$

| Node 3    |       |
|-----------|-------|
| Mean      | 4.024 |
| Std. Dev. | 3.035 |
| n         | 85    |
| %         | 72.6  |
| Predicted | 4.024 |

| Node 4    |       |
|-----------|-------|
| Mean      | 7.111 |
| Std. Dev. | 3.756 |
| n         | 18    |
| %         | 15.4  |
| Predicted | 7.111 |
